# Supplementary material for: Automated Condition-Based Suppression of the CPR Artifact in ECG Data to Make a Reliable Shock Decision for AEDs during CPR
Source: MDPI journal article supplement (doi:10.3390/s21248210), 2021-12-08
Supplement: s1 [file s1]

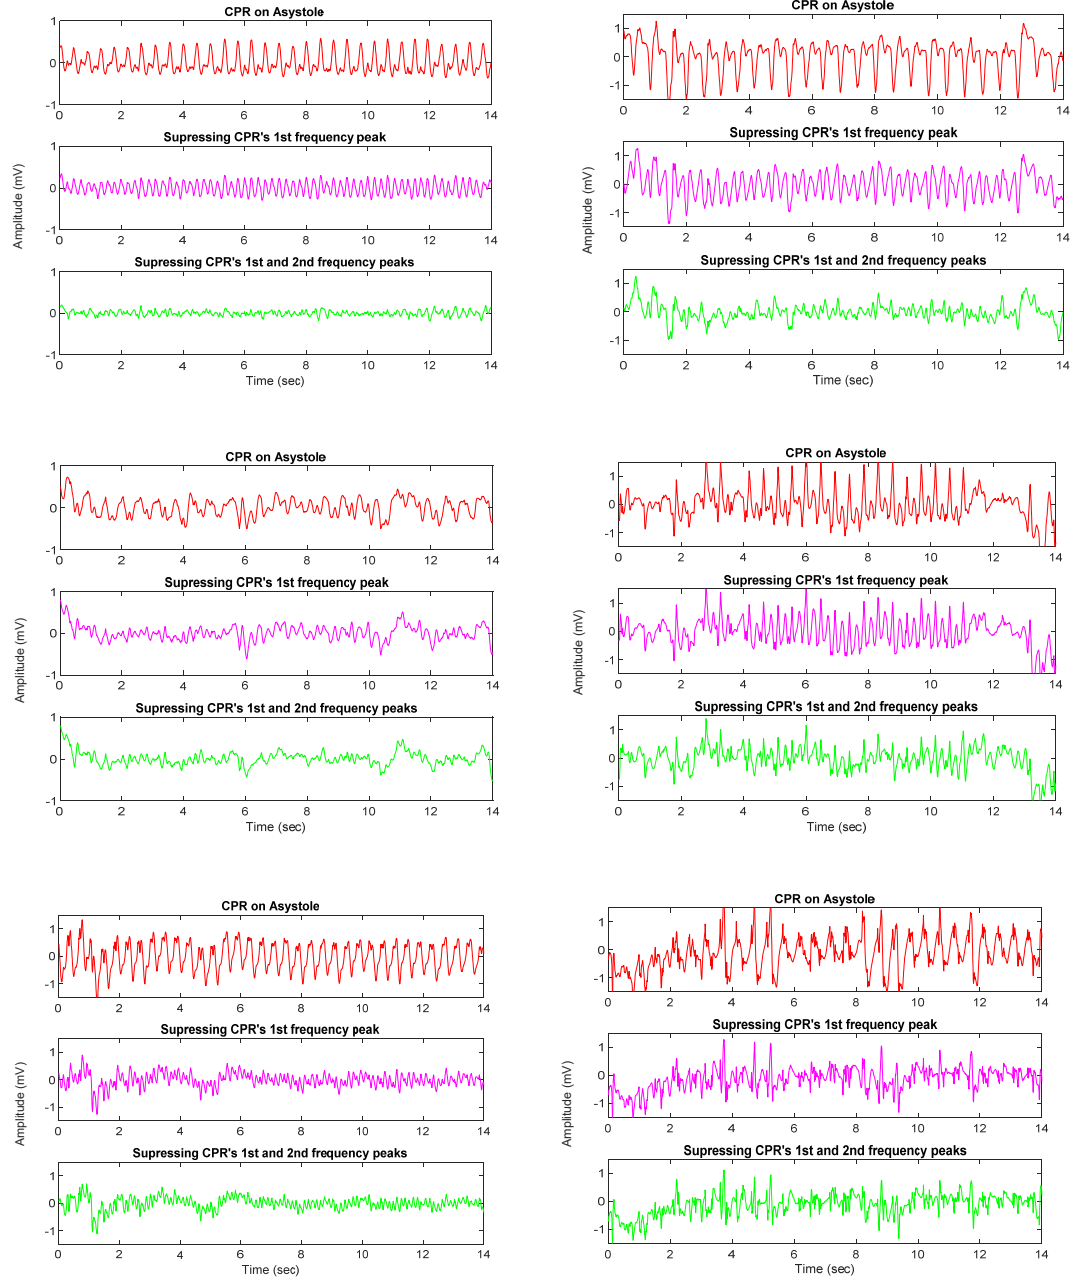

**Figure S1.** Applying the proposed condition-based filtering approach on representative examples asystole rhythms during CPR. Left and right columns show successful and failed filtering, respectively.
